# Supplementary material
Source: PubMed Central journal article supplement (PMC5595147)
Supplement: NIHMS888894-supplement-supplement_1.pdf [file NIHMS888894-supplement-supplement_1.pdf]

**Supplemental Table 1. Age-adjusted ovarian cancer incidence rates per 100,000 woman-years by continent and country from 1973-2007, Cancer Incidence in Five Continents (CI5) volume IV- X**

| Region                              | 1973-1977 |                   | 1978-1982 |                   | 1983-1987 |                   | 1988-1992 |                   | 1993-1997         |                   | 1998-2002         |                   | 2003-2007        |                   | APC (95% CI)      |
|-------------------------------------|-----------|-------------------|-----------|-------------------|-----------|-------------------|-----------|-------------------|-------------------|-------------------|-------------------|-------------------|------------------|-------------------|-------------------|
|                                     | Cases     | Rate (95% CI)     | Cases             | Rate (95% CI)     | Cases             | Rate (95% CI)     | Cases            | Rate (95% CI)     |                   |
| <b>Northern Europe</b>              |           |                   |           |                   |           |                   |           |                   |                   |                   |                   |                   |                  |                   |                   |
| Denmark                             | 2610      | 14.5 (14.0, 15.1) | 2621      | 14.2 (13.6, 14.8) | 2666      | 14.2 (13.7, 14.8) | 2572      | 13.7 (13.1, 14.3) | 2573              | 13.2 (12.7, 13.8) | 2707              | 13.2 (12.7, 13.8) | 2451             | 11.4 (10.9, 11.8) | -0.7 (-1.1, -0.3) |
| Norway                              | 1796      | 13.1 (12.5, 13.8) | 1861      | 13.2 (12.5, 13.8) | 1998      | 13.9 (13.2, 14.5) | 1904      | 12.8 (12.2, 13.5) | 2008              | 13.1 (12.5, 13.7) | 2072              | 13.0 (12.4, 13.6) | 1874             | 11.3 (10.8, 11.8) | -0.4 (-0.9, 0.1)  |
| Finland                             | 1574      | 9.5 (9.0, 10.0)   | 1647      | 9.5 (9.1, 10.0)   | 1750      | 9.7 (9.2, 10.2)   | 1980      | 10.5 (10.1, 11.0) | 2115              | 10.9 (10.4, 11.4) | 2078              | 10.0 (9.6, 10.5)  | 2173             | 9.9 (9.5, 10.4)   | 0.3 (-0.2, 0.7)   |
| Sweden                              | 4649      | 15.3 (14.8, 15.8) | 4582      | 14.9 (14.4, 15.4) | 4520      | 14.2 (13.8, 14.7) | 4227      | 13.0 (12.6, 13.4) | 4011              | 12.0 (11.6, 12.4) | 3682              | 10.8 (10.4, 11.2) | 3364             | 9.5 (9.2, 9.9)    | -1.5 (-1.9, -1.2) |
| Iceland                             | 68        | 11.9 (9.1, 15.2)  | 76        | 12.4 (9.7, 15.6)  | 90        | 13.1 (10.5, 16.3) | 74        | 10.0 (7.7, 12.8)  | 93                | 12.0 (9.6, 14.8)  | 92                | 10.3 (8.2, 12.8)  | 71               | 7.3 (5.6, 9.3)    | -1.3 (-2.6, 0.0)  |
| <b>Western Europe</b>               |           |                   |           |                   |           |                   |           |                   |                   |                   |                   |                   |                  |                   |                   |
| UK                                  |           |                   | 8408      | 11.5 (11.2, 11.8) | 12583     | 12.2 (11.9, 12.4) | 15171     | 12.6 (12.4, 12.8) | 17225             | 12.8 (12.6, 13.0) | 17379             | 12.1 (11.9, 12.3) | 19530            | 12.5 (12.3, 12.7) | 0.2 (-0.2, 0.7)   |
| Germany                             | 419       | 9.7 (8.8, 10.8)   | 421       | 9.3 (8.3, 10.3)   | 449       | 9.8 (8.8, 10.8)   | 456       | 9.7 (8.7, 10.7)   | 482               | 10.2 (9.2, 11.2)  | 470               | 9.7 (8.8, 10.8)   | 472              | 9.8 (8.9, 10.9)   | 0.1 (-0.1, 0.4)   |
| Switzerland                         | 145       | 11.5 (9.6, 13.7)  | 148       | 11.3 (9.4, 13.4)  | 444       | 11.9 (10.7, 13.1) | 718       | 10.6 (9.8, 11.5)  | 776               | 9.5 (8.8, 10.2)   | 817               | 9.4 (8.8, 10.2)   | 848              | 9.2 (8.6, 9.9)    | -0.9 (-1.3, -0.4) |
| France                              |           |                   | 809       | 10.0 (9.3, 10.7)  | 1325      | 10.9 (10.3, 11.5) | 1764      | 10.0 (9.6, 10.5)  | 1972              | 10.3 (9.9, 10.8)  | 2018              | 9.3 (8.8, 9.7)    | 2041             | 8.9 (8.4, 9.3)    | -0.6 (-1.3, 0.1)  |
| Austria                             |           |                   |           |                   |           |                   | 310       | 14.4 (12.8, 16.2) | 433               | 12.7 (11.5, 14.0) | 411               | 11.2 (10.1, 12.4) | 360              | 8.6 (7.7, 9.6)    | -3.1 (-4.7, -1.3) |
| Spain                               | 75        | 5.1 (4.0, 6.4)    | 98        | 6.2 (5.0, 7.6)    | 530       | 6.6 (6.1, 7.3)    | 686       | 7.2 (6.6, 7.8)    | 1144              | 8.1 (7.6, 8.6)    | 1226              | 8.1 (7.6, 8.6)    | 1387             | 8.2 (7.8, 8.7)    | 1.6 (1.0, 2.3)    |
| Netherlands                         |           |                   |           |                   |           |                   |           | 6458              | 11.9 (11.6, 12.3) | 5888              | 10.3 (10.0, 10.6) | 5003              | 8.1 (7.9, 8.4)   | -3.5 (-7.9, 2.5)  |                   |
| <b>Eastern/<br/>Southern Europe</b> |           |                   |           |                   |           |                   |           |                   |                   |                   |                   |                   |                  |                   |                   |
| Poland                              |           |                   | 251       | 10.7 (9.3, 12.1)  | 271       | 11.2 (9.9, 12.7)  | 346       | 13.4 (11.9, 14.9) | 355               | 12.9 (11.6, 14.4) | 447               | 14.7 (13.3, 16.2) |                  |                   | 1.6 (0.6, 2.7)    |
| Latvia                              |           |                   |           |                   |           |                   | 1318      | 13.3 (12.6, 14.1) | 1332              | 13.4 (12.6, 14.2) | 1384              | 13.8 (13.1, 14.6) | 1398             | 14.3 (13.5, 15.1) | 0.5 (0.1, 0.9)    |
| Czech Republic                      |           |                   |           |                   | 4426      | 12.4 (12.0, 12.8) | 4719      | 13.1 (12.7, 13.5) | 5187              | 13.8 (13.4, 14.2) | 5427              | 13.4 (13.0, 13.8) | 5160             | 12.3 (12.0, 12.7) | 0.0 (-1.1, 1.1)   |
| Estonia                             | 651       | 11.9 (11.0, 12.9) | 662       | 11.5 (10.6, 12.4) | 741       | 12.6 (11.7, 13.6) | 736       | 12.3 (11.4, 13.3) | 737               | 12.4 (11.5, 13.4) | 734               | 12.3 (11.3, 13.3) | 704              | 11.9 (10.9, 12.9) | 0.1 (-0.3, 0.4)   |
| Slovakia                            | 1243      | 9.0 (8.5, 9.5)    | 1330      | 9.1 (8.6, 9.6)    | 1511      | 10.0 (9.5, 10.5)  | 1731      | 11.0 (10.4, 11.5) | 1804              | 10.4 (9.9, 10.9)  | 2047              | 11.0 (10.5, 11.5) | 2192             | 11.3 (10.8, 11.8) | 0.8 (0.4, 1.2)    |
| Malta                               |           |                   |           |                   |           |                   |           | 141               | 11.5 (9.7, 13.7)  | 167               | 12.3 (10.5, 14.4) | 167               | 11.0 (9.3, 12.9) | -0.5 (-10.1,      |                   |
| Slovenia                            | 593       | 10.0 (9.2, 10.9)  | 574       | 9.1 (8.3, 9.9)    | 637       | 9.8 (9.0, 10.6)   | 722       | 10.4 (9.7, 11.2)  | 714               | 9.8 (9.1, 10.6)   | 788               | 9.8 (9.1, 10.6)   | 853              | 10.7 (9.9, 11.5)  | 0.3 (-0.2, 0.7)   |
| Italy                               |           |                   | 475       | 10.9 (9.9, 12.0)  | 1058      | 9.5 (8.9, 10.1)   | 1916      | 9.3 (8.9, 9.8)    | 2499              | 9.8 (9.4, 10.2)   | 2553              | 9.6 (9.2, 10.0)   | 2267             | 8.6 (8.2, 9.0)    | -0.6 (-1.3, 0.1)  |
| <b>North/South America</b>          |           |                   |           |                   |           |                   |           |                   |                   |                   |                   |                   |                  |                   |                   |
| US: White                           |           |                   | 6618      | 11.8 (11.5, 12.1) | 7148      | 12.2 (11.9, 12.5) | 7177      | 11.5 (11.3, 11.8) | 7174              | 10.9 (10.7, 11.2) | 7335              | 10.6 (10.3, 10.8) | 7010             | 9.6 (9.4, 9.9)    | -0.9 (-1.3, -0.4) |
| US: Black                           |           |                   | 451       | 8.5 (7.7, 9.3)    | 505       | 8.5 (7.7, 9.2)    | 518       | 7.8 (7.1, 8.5)    | 552               | 7.3 (6.7, 7.9)    | 602               | 7.1 (6.5, 7.7)    | 719              | 7.3 (6.8, 7.9)    | -0.7 (-1.2, -0.3) |
| Canada                              | 585       | 10.8 (9.9, 11.7)  | 973       | 11.7 (10.9, 12.4) | 971       | 10.8 (10.1, 11.5) | 1048      | 11.1 (10.4, 11.8) | 1126              | 11.4 (10.7, 12.1) | 906               | 8.6 (8.0, 9.2)    | 961              | 8.4 (7.9, 9.0)    | -0.9 (-1.8, 0.0)  |
| Goiania, Brazil                     |           |                   |           |                   |           |                   | 90        | 5.3 (4.2, 6.6)    | 96                | 5.0 (4.0, 6.1)    | 151               | 6.5 (5.5, 7.6)    | 257              | 9.5 (8.3, 10.7)   | 4.4 (-2.1, 13.3)  |
| Quito, Ecuador                      |           |                   |           |                   |           |                   | 138       | 6.3 (5.2, 7.4)    | 192               | 7.9 (6.8, 9.2)    | 194               | 6.0 (5.2, 7.0)    | 261              | 7.5 (6.6, 8.5)    | 0.5 (-4.8, 7.8)   |
| <b>Asia/Oceania</b>                 |           |                   |           |                   |           |                   |           |                   |                   |                   |                   |                   |                  |                   |                   |
| Singapore                           | 258       | 6.2 (5.4, 7.0)    | 399       | 8.4 (7.6, 9.3)    | 491       | 8.7 (8.0, 9.6)    | 689       | 10.4 (9.7, 11.3)  | 646               | 8.8 (8.1, 9.6)    | 756               | 8.2 (7.6, 8.8)    | 955              | 8.8 (8.2, 9.4)    | 0.7 (-0.7, 2.3)   |
| Israel: Jews                        | 906       | 11.4 (10.7, 12.2) | 1000      | 11.2 (10.5, 12.0) | 1156      | 11.8 (11.1, 12.5) | 1313      | 12.2 (11.5, 12.9) | 1576              | 12.0 (11.4, 12.6) | 1530              | 9.8 (9.3, 10.3)   | 1439             | 8.5 (8.0, 8.9)    | -0.8 (-1.8, 0.2)  |
| New Zealand                         |           |                   |           |                   | 931       | 9.9 (9.3, 10.6)   | 1029      | 10.3 (9.6, 10.9)  | 1109              | 9.9 (9.3, 10.6)   | 1120              | 9.1 (8.6, 9.7)    | 1160             | 8.5 (8.0, 9.0)    | -0.9 (-1.7, 0.0)  |
| Australia                           |           |                   | 405       | 7.8 (7.0, 8.6)    | 3996      | 8.7 (8.4, 9.0)    | 4484      | 8.8 (8.5, 9.1)    | 4707              | 8.4 (8.1, 8.6)    | 4920              | 7.9 (7.6, 8.1)    | 5220             | 7.6 (7.4, 7.8)    | -0.3 (-1.1, 0.6)  |
| Japan                               | 748       | 3.6 (3.3, 3.9)    | 1371      | 4.6 (4.3, 4.8)    | 1879      | 5.6 (5.3, 5.8)    | 2488      | 5.8 (5.6, 6.1)    | 2778              | 6.0 (5.8, 6.2)    | 2831              | 5.7 (5.5, 5.9)    | 3226             | 6.5 (6.2, 6.7)    | 1.7 (0.6, 2.9)    |
| Thailand                            |           |                   |           |                   | 138       | 4.9 (4.1, 5.9)    | 156       | 4.6 (3.9, 5.4)    | 393               | 4.6 (4.1, 5.1)    | 550               | 5.7 (5.2, 6.2)    | 621              | 5.7 (5.2, 6.2)    | 1.0 (-0.8, 3.0)   |

Note: Ordered by highest to lowest incidence rate within each region in 2003-  
Abbreviations: APC, annual percent change; p, p-value.
